# Two Regulators of *Vibrio parahaemolyticus* Play Important Roles in Enterotoxicity by Controlling the Expression of Genes in the Vp-PAI Region

Toshio Kodama<sup>1\*</sup>, Kazuyoshi Gotoh<sup>2</sup>, Hiroataka Hiyoshi<sup>2</sup>, Mikiharu Morita<sup>1</sup>, Kaori Izutsu<sup>2</sup>, Yukihiro Akeda<sup>1</sup>, Kwon-Sam Park<sup>1,3</sup>, Vlademir V. Cantarelli<sup>1,4</sup>, Rikard Dryselius<sup>2</sup>, Tetsuya Iida<sup>2</sup>, Takeshi Honda<sup>1</sup>

**1** Department of Bacterial Infections, Research Institute for Microbial Diseases, Osaka University, Suita, Osaka, Japan, **2** International Research Center for Infectious Diseases, Research Institute for Microbial Diseases, Osaka University, Suita, Osaka, Japan, **3** Department of Food Science and Technology, College of Ocean Science and Technology, Kusan National University, Kusan, Jeollabuk-do, Korea, **4** Centro Universitário Feevale, Novo Hamburgo, Rio Grande do Sul, Brazil

## Abstract

*Vibrio parahaemolyticus* is an important pathogen causing food-borne disease worldwide. An 80-kb pathogenicity island (Vp-PAI), which contains two *tdh* (thermostable direct hemolysin) genes and a set of genes for the type III secretion system (T3SS2), is closely related to the pathogenicity of this bacterium. However, the regulatory mechanisms of Vp-PAI's gene expression are poorly understood. Here we report that two novel ToxR-like transcriptional regulatory proteins (VtrA and VtrB) regulate the expression of the genes encoded within the Vp-PAI region, including those for TDH and T3SS2-related proteins. Expression of *vtrB* was under control of the VtrA, as vector-expressed *vtrB* was able to recover a functional protein secretory capacity for T3SS2, independent of VtrA. Moreover, these regulatory proteins were essential for T3SS2-dependent biological activities, such as *in vitro* cytotoxicity and *in vivo* enterotoxicity. Enterotoxic activities of *vtrA* and/or *vtrB* deletion strains derived from the wild-type strain were almost absent, showing fluid accumulation similar to non-infected control. Whole genome transcriptional profiling of *vtrA* or *vtrB* deletion strains revealed that the expression levels of over 60 genes were downregulated significantly in these deletion mutant strains and that such genes were almost exclusively located in the Vp-PAI region. These results strongly suggest that VtrA and VtrB are master regulators for virulence gene expression in the Vp-PAI and play critical roles in the pathogenicity of this bacterium.

**Citation:** Kodama T, Gotoh K, Hiyoshi H, Morita M, Izutsu K, et al. (2010) Two Regulators of *Vibrio parahaemolyticus* Play Important Roles in Enterotoxicity by Controlling the Expression of Genes in the Vp-PAI Region. PLoS ONE 5(1): e8678. doi:10.1371/journal.pone.0008678

**Editor:** Adam J. Ratner, Columbia University, United States of America

**Received:** October 30, 2009; **Accepted:** December 2, 2009; **Published:** January 13, 2010

**Copyright:** © 2010 Kodama et al. This is an open-access article distributed under the terms of the Creative Commons Attribution License, which permits unrestricted use, distribution, and reproduction in any medium, provided the original author and source are credited.

**Funding:** This work was supported by Grants-in-Aid for Young Scientists (21790419, <http://kaken.nii.ac.jp/ja/p/21790419>) and Scientific Research on Priority Areas Applied Genomics (17019058, <http://kaken.nii.ac.jp/ja/p/17019058>), and Matrix of Infection Phenomena from the Ministry of Education (18073003, <http://kaken.nii.ac.jp/ja/p/18073003>), Culture, Sports, Science and Technology of Japan. The funders had no role in study design, data collection and analysis, decision to publish, or preparation of the manuscript.

**Competing Interests:** The authors have declared that no competing interests exist.

\* E-mail: kodama@biken.osaka-u.ac.jp

## Introduction

*Vibrio parahaemolyticus* is a gram-negative marine bacterium that causes acute gastroenteritis in humans associated with the consumption of raw or undercooked seafood [1,2]. In some cases, infection by this pathogen results in primary septicemia and wound infections [3,4]. Most of the clinical isolates of *V. parahaemolyticus* isolated from patients with diarrhea exhibit beta-hemolysis on a special blood agar plate (Wagatsuma agar), whereas environmental isolates barely do so [5]. This hemolysis is called the Kanagawa phenomenon (KP), which has been considered to be a useful marker to distinguish pathogenic from non-pathogenic strains [6,7]. Thermostable direct hemolysin (TDH) is responsible for KP and purified TDH shows a number of biological effects, such as erythrocyte lysis, cytotoxicity and induction of fluid accumulation in an ileal loop model [6,8,9,10,11,12,13,14,15,16,17]. Thus, TDH has been considered a major virulence factor of *V. parahaemolyticus*.

Whole genome sequencing of a KP-positive *V. parahaemolyticus* strain RIMD2210633 revealed that this strain contains two sets

of gene clusters for Type III Secretion System (T3SS), one on each of its two chromosomes (termed T3SS1 and T3SS2, respectively) [18]. Recently, comparative genomic analysis using microarray revealed that an 80-kb pathogenicity island (Vp-PAI) on chromosome II is conserved exclusively in KP-positive pathogenic strains and not in KP-negative strains [19,20]. Vp-PAI contains not only two *tdh* genes (*tdhA* and *tdhS*) but also the T3SS2 gene cluster. This is highly associated with KP-positive strains and is also involved in the enterotoxicity of this bacterium [19,21,22]. Therefore, Vp-PAI has been considered to be related to the pathogenicity of *V. parahaemolyticus* in humans. Despite having an important role in pathogenicity in humans, the regulatory mechanism of genes expression from Vp-PAI is poorly understood.

In this study, we show that two putative DNA-binding proteins encoded within the Vp-PAI region, which have a winged-helix-turn-helix (WHTH) DNA-binding domain of the OmpR family, control the expression of Vp-PAI's genes in a highly specific manner. Accordingly, they must play a critical role in the pathogenicity of *V. parahaemolyticus*.

## Results

### VPA1332 (VtrA) and VPA1348 (VtrB) Have a Winged-Helix-Turn-Helix (WHTH) DNA-Binding Domain of the OmpR Family

In our functional analysis of T3SS2 in *V. parahaemolyticus*, we noted that two open reading frames (ORFs) (VPA1332 and VPA1348), which share a degree of identity with the N-terminal end of *V. cholerae* and *V. parahaemolyticus* ToxR (32% and 34% identity with *V. cholerae* ToxR, and 45% and 32% identity with *V. parahaemolyticus* ToxR, respectively), were encoded in the Vp-PAI locus. ToxR is a transcription factor found in *V. cholerae* that regulates expression of the genes encoding cholera toxin (CT) and toxin-coregulated pilus (TCP) [23]. The N-terminal domain of ToxR encodes a WHTH DNA-binding domain, which is a typical characteristic of the OmpR family of proteins and is necessary for transcriptional regulation of ToxR regulons [24]. The WHTH domain consists of an amino-terminal four-stranded beta sheet, a central three-helical bundle and a carboxy-terminal two-stranded beta sheet. The predicted secondary structures of the N-terminal portions of VPA1332 and VPA1348 were also similar to the DNA-binding domains of OmpR and PhoB of *E. coli* (Fig. 1). Multiple sequence alignments of these proteins revealed that most of the amino acids forming hydrophobic cores were conserved in VPA1332 and VPA1348 and that highly conserved amino acids were identical to that of OmpR and PhoB. Therefore, VPA1332 and VPA1348 were termed VtrA (*V. parahaemolyticus* T3SS2 regulator A) and VtrB, respectively. Their possible roles as transcriptional regulators were examined in the following experiments.

### VtrA and VtrB Regulate the Expression of the Genes for T3SS2-Related Proteins and TDH

We first constructed *vtrA* and/or *vtrB* deletion strains from TDH-producing *V. parahaemolyticus* RIMD2210633 and then examined

their effects on the production of T3SS1- and T3SS2-related proteins and TDH by immunoblotting. As shown in Fig. 2A, deletion of the *vtrA* or *vtrB* genes did not affect on the production of T3SS1-related proteins (VscC1, T3SS1 apparatus protein; VopD1, T3SS1 translocon protein and VepA, T3SS1 effector protein), whereas either deletion mutant produced a marked decrease in T3SS2-related proteins (VscC2, T3SS2 apparatus protein; VopD2, T3SS2 translocon protein VopC, T3SS2 effector protein) and in TDH both in bacterial pellets and supernatants. The amounts of T3SS2-related proteins and TDH were recovered fully in both the bacterial pellets and supernatants by complementation of each gene (Fig. 2B). Interestingly, vector-expressed *vtrB* (*pvtrB*) could also completely restore the production of T3SS2-related proteins and TDH for the WTΔ*vtrA* strain in both the bacterial pellets and supernatants. Although vector-expressed *vtrA* (*pvtrA*) could recover the production of TDH in the supernatant and VopD2 and VopC proteins of the bacterial pellet of the WTΔ*vtrB* strain, no VscC2 protein was found in the bacterial pellet, and neither of the VopD2 and VopC proteins could be detected in the supernatant. In a similar fashion, in a double deletion mutant strain (WTΔ*vtrA*Δ*vtrB*), complementation with *vtrB* (*pvtrB*) led to recovery of all proteins in both the bacterial pellet and the supernatant, whereas VopD2 and VopC proteins in the supernatant and VscC2 protein in the bacterial pellet were not detected by complementation with *vtrA* (*pvtrA*). Unlike VopD2, VopC, and TDH, VscC2 protein production seemed to be controlled strictly by *vtrB*. Hence, it was next determined whether a gene located on the same operon as the *vscC2* gene was also regulated by VtrB. Production of the VP1343 protein, which was expected to be co-transcribed with *vscC2* (Fig. 2C), was examined by immunoblotting. VP1343 protein was not detected in bacterial pellets from *vtrA* and/or *vtrB* deletion strains (Fig. 2D, upper panel). Similar to the VscC2 protein, vector-expressed *vtrB* could overcome a defect in VPA1343 production in *vtrA* deletion strains, such as WTΔ*vtrA* and WTΔ*vtrA*Δ*vtrB*, whereas

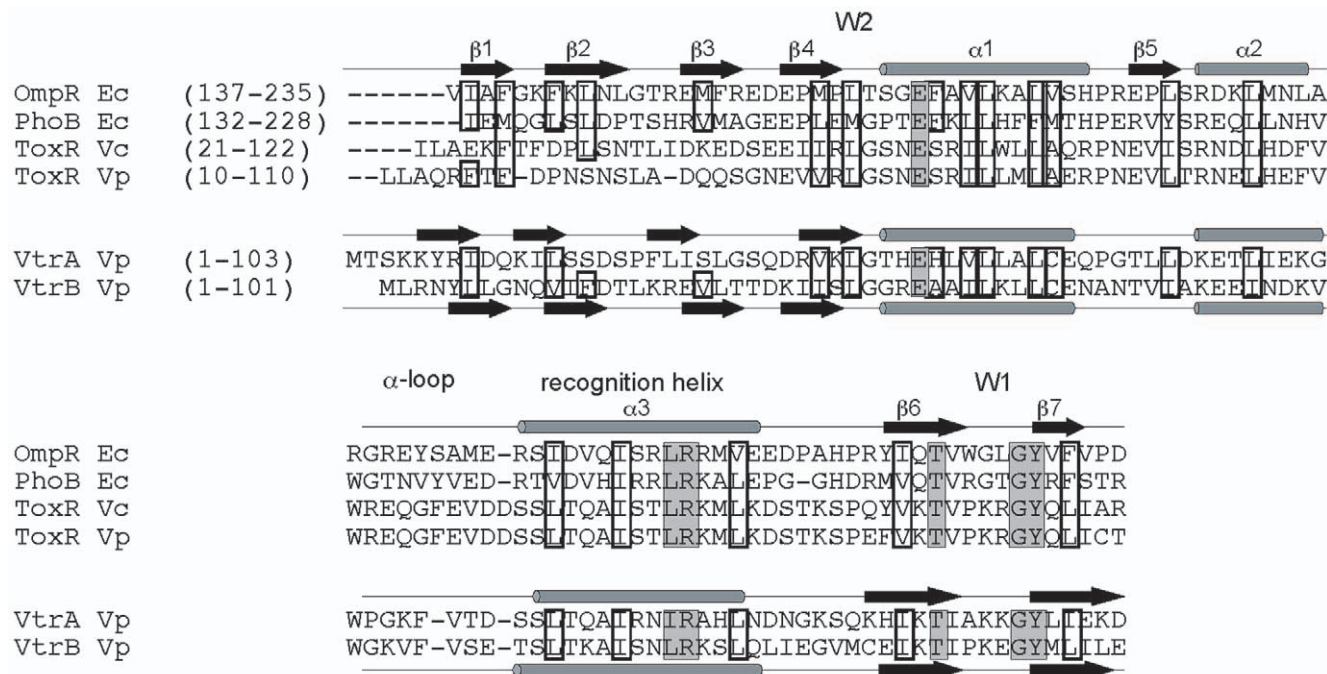

**Figure 1. VPA1332 (VtrA) and VPA1348 (VtrB) have a winged-helix-turn-helix DNA-binding domain of OmpR family.** Multiple sequence alignment and secondary structure assignments of DNA-binding and trans-activation domains of OmpR, PhoB, ToxR, VtrA, and VtrB proteins are shown. The amino acids that form the hydrophobic cores are highlighted with boxes. Highly conserved amino acids are highlighted with gray boxes. doi:10.1371/journal.pone.0008678.g001

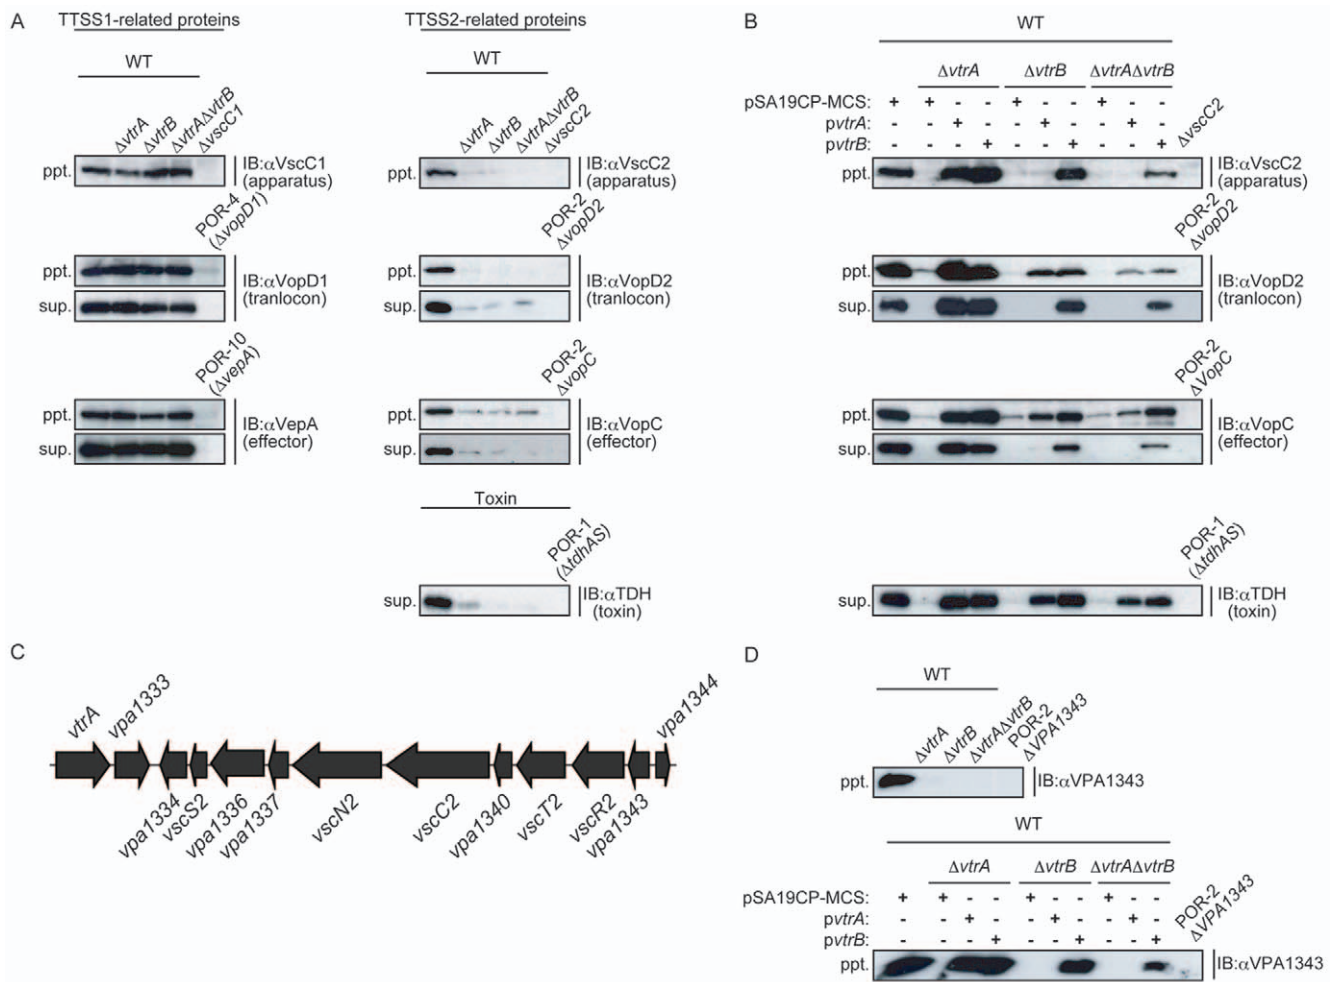

**Figure 2. VtrA and VtrB regulate the expression levels of T3SS2-related proteins and TDH.** A. Loss of *vtrA* and *vtrB* diminished the expression of T3SS2-related proteins and TDH. Western blot analysis of bacterial pellets (ppt.) and secreted proteins (sup.) from isogenic mutants of wild-type (WT) *V. parahaemolyticus*. Lane 1, wild-type *V. parahaemolyticus* (WT); lane 2, *vtrA* deletion strain (WT $\Delta vtrA$ ); lane 3, *vtrB* deletion strain (WT $\Delta vtrB$ ); lane 4, *vtrA* and *vtrB* double deletion strain (WT $\Delta vtrA\Delta vtrB$ ). Samples from indicated strains were loaded in lane 5 to confirm the specificity of each antibody. Blots were probed with anti-VscC1, anti-VopD1, anti-VepA, anti-VscC2, anti-VopD2, anti-VopC, and anti-TDH polyclonal antibodies. B. Vector-induced *vtrB* could restore the secretory capacity of T3SS2 independent of *vtrA*. Western blot analyses of bacterial pellets (ppt.) and secreted proteins (sup.) from indicated strains are shown. Blots were probed with anti-VscC2, anti-VopD2, anti-VopC, and anti-TDH polyclonal antibodies. C. Genetic organization of the DNA region containing *vscC2* and *vpa1343* of *V. parahaemolyticus* RIMD2210633. D. VPA1343 protein expression was strictly regulated by VtrB. Western blot analysis of bacterial pellets (ppt.) from isogenic mutants of wild-type (WT) *V. parahaemolyticus* (upper panel) and their complemented strains (lower panel). Blots were probed with anti-VPA1343 polyclonal antibodies.  
doi:10.1371/journal.pone.0008678.g002

vector-expressed *vtrA* did not induce VPA1343 production in *vtrB* deletion strains (WT $\Delta vtrB$  and WT $\Delta vtrA\Delta vtrB$ ) (Fig. 2D, lower panel). Together, these results suggest that *vtrA* and *vtrB* are necessary for the expression of genes encoding T3SS2-related proteins and TDH and that the operon containing *vscC2* and *vpa1343* is strictly controlled by *vtrB*. As this operon contains some genes homologous to the T3SS-apparatus (*vscS2*, *vscN2*, *vscC2*, *vscT2* and *vscR2*) (Fig. 2C) that are essential for T3SS secretion, this could explain why, in vector-expressed *vtrA*, only T3SS2 secreted proteins (VopD2 and VopC proteins) in the bacterial pellets of the WT $\Delta vtrB$  and WT $\Delta vtrA\Delta vtrB$  strains.

#### Expression of VtrB Is Controlled Directly by VtrA

Based on the above observations that vector-induced *vtrB* could restore the production of TDH and T3SS2-related protein even though both *vtrB* and *vtrA* are essential for the production of these proteins (Fig. 2), we next examined the possibility that *vtrA* might

regulate *vtrB* expression. For this, we used *vtrA-lacZ* or *vtrB-lacZ* transcriptional fusion reporters. Neither *vtrA* nor *vtrB* gene deletion had any influence on *vtrA-lacZ* transcription in *V. parahaemolyticus* (Fig. 3A). In contrast, *vtrB-lacZ* transcription decreased dramatically in the *vtrA* deletion strains (Fig. 3B). Immunoblotting of VtrA and VtrB proteins in the *vtrA* and/or *vtrB* deletion strains revealed that VtrA protein production occurs regardless of the expression of *vtrB*, whereas deletion of *vtrA* caused a decrease in production of the VtrB protein (Fig. 3C). This transcriptional activation of VtrA against *vtrB* gene transcription was also observed in *E. coli*, as *vtrB-lacZ* transcription was significantly induced only when VtrA was produced (Fig. 3D). Direct binding of the VtrA DNA binding domain to *vtrB* promoter DNA was then examined by a gel shift assay. A shift in electrophoretic mobility of *vtrB* promoter DNA was observed at a low concentration of the VtrA DNA binding domain (Fig. 3E, upper panel), whereas only a weak shift was seen at the highest concentration of VtrB DNA binding domain

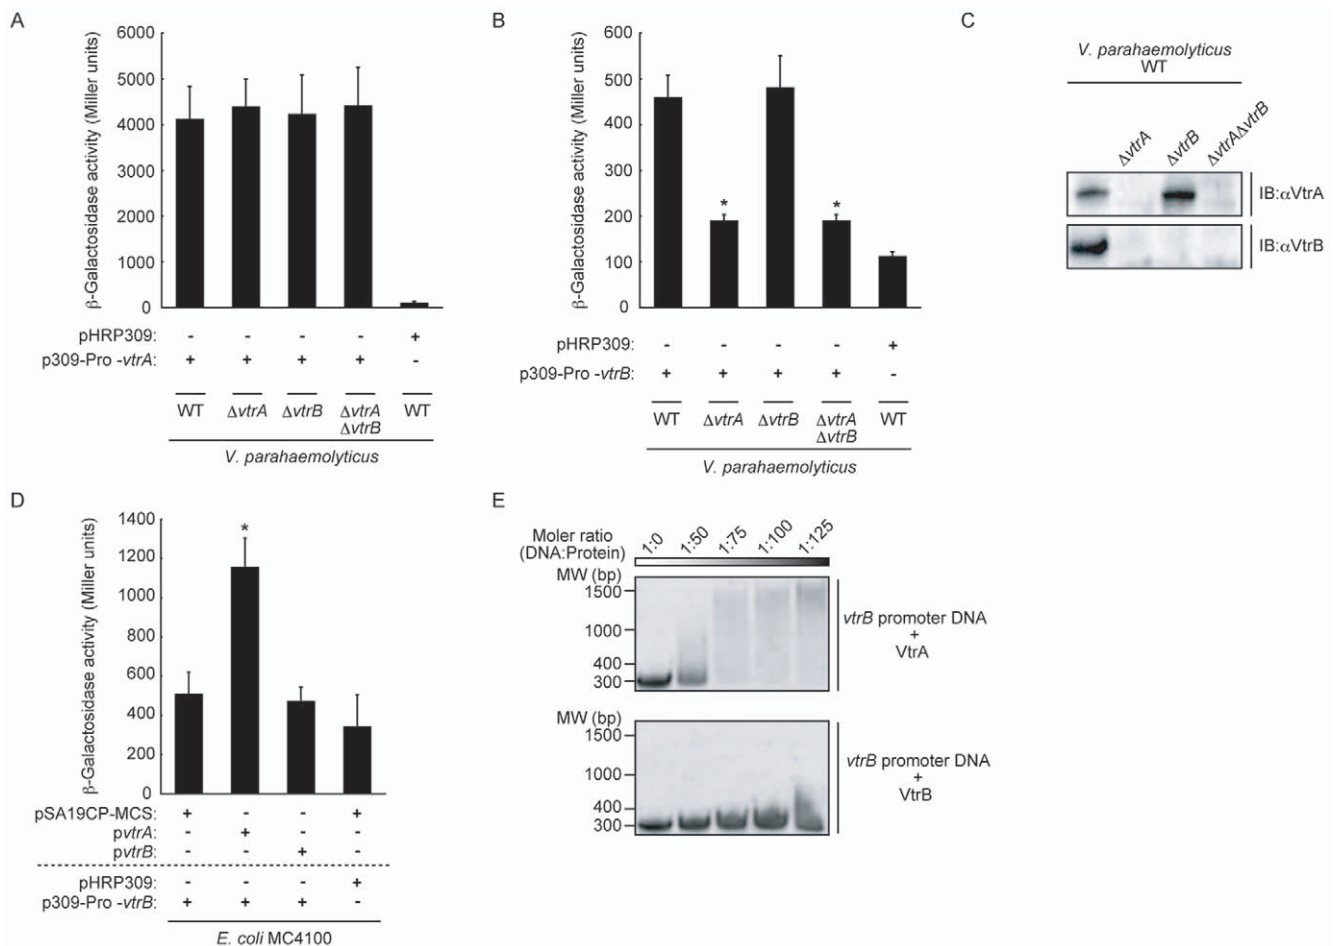

**Figure 3. VtrB expression is under the control of VtrA.** A. Neither *vtrA* nor *vtrB* was involved in the transcription of *vtrA*. *V. parahaemolyticus* strains carrying the *vtrA-lacZ* transcriptional fusion vector were assayed for  $\beta$ -galactosidase activity. The bars show the average of three separate experiments, and the standard deviations are indicated by error bars. B. Transcription of *vtrB* was decreased in *vtrA* deletion strains. *V. parahaemolyticus* strains carrying the *vtrB-lacZ* transcriptional fusion vector were assayed for  $\beta$ -galactosidase activity. The bars show the average of three separate experiments, and the standard deviations are indicated by error bars. C. Deletion of *vtrA* caused a decrease in the production of VtrB. Immunoblot analysis of VtrA and VtrB protein expression in *vtrA* and *vtrB* mutant strains are shown. Lane 1, wild-type *V. parahaemolyticus* (WT); lane 2, *vtrA* mutant strain (WT $\Delta vtrA$ ); lane 3, *vtrB* mutant strain (WT $\Delta vtrB$ ); lane 4, *vtrA* and *vtrB* double mutant strain (WT $\Delta vtrA \Delta vtrB$ ). Blots were probed with anti-VtrA (upper panel) and anti-VtrB (lower panel) polyclonal antibodies. D. Effects of *vtrA* and *vtrB* expression on *vtrB* transcription in *E. coli*. *E. coli* MC4100 carrying *vtrB-lacZ* transcriptional fusion vector were assayed for  $\beta$ -galactosidase activity. The bars show the average of three separate experiments, and the standard deviations are indicated by error bars. E. Binding of purified VtrA DNA binding domain to the upstream region of *vtrB* is shown by an electrophoretic mobility shift assay. Each lane contains the same amount of upstream region of *vtrB* (30 nM) and various concentrations (0, 1.5, 2.25, 3.0, 4  $\mu$ M) of VtrA DNA binding domain (upper panel) or VtrB DNA binding domain (lower panel). The molecular ratios are indicated in the top line.  
doi:10.1371/journal.pone.0008678.g003

(Fig. 3E, lower panel). These results indicate that VtrA activates *vtrB* gene transcription by direct binding to its promoter.

### VtrA and VtrB Play Critical Roles in T3SS2-Dependent Cytotoxicity

One characteristic of T3SSs in *V. parahaemolyticus* is their ability to cause cytotoxic effects on Caco-2 cells *in vitro* [25,26]. Therefore, we next examined the role of *vtrA* and *vtrB* in T3SS1- and T3SS2-mediated cytotoxicity. Deletion of the *vtrA* or the *vtrB* gene in the *tdhA5-* and T3SS2-deficient strain POR-3 (POR-3 $\Delta vtrA$  and POR-3 $\Delta vtrB$ , respectively) had no effect on T3SS1-dependent cytotoxicity (Fig. 4A). By contrast, deletion of the *vtrA* and/or the *vtrB* from the *tdhA5-* and T3SS1-deficient strain POR-2 (POR-2 $\Delta vtrA$ , POR-2 $\Delta vtrB$ , and POR-2 $\Delta vtrA \Delta vtrB$ , respectively) caused a decrease in cytotoxicity similar to that of the  $\Delta vcrD1 \Delta vcrD2$  strain, which is deficient in both T3SS1 and

T3SS2 (Fig. 4B). A vector-expressed *vtrB* was able to overcome the defect in cytotoxicity of *vtrA* deletion strains (POR-2 $\Delta vtrA$  and POR-2 $\Delta vtrA \Delta vtrB$ ). This result is in accordance with the previous results, showing that vector-expressed *vtrB* could recover the diminished secretory capacity of T3SS2 in *vtrA* deletion strains as shown in Fig. 2B and C. In contrast, complementation with *vtrA* restored cytotoxic capacity in the POR-2 $\Delta vtrA$  strain but not in any of the POR-2 $\Delta vtrB$  or POR-2 $\Delta vtrA \Delta vtrB$  strains, which is also in agreement with the results shown in Fig. 2. Finally, the effect of *vtrA* and *vtrB* overexpression on T3SS2-dependent cytotoxicity was determined (Fig. 4C). Overexpression either *vtrA* or *vtrB* resulted in dramatic accelerations in cytotoxic activity from a *tdhA5-* and T3SS1-deficient strain (POR-2), whereas no effect was observed from overexpression in a *tdhA5-* and T3SS1/T3SS2-deficient strain ( $\Delta vcrD1 \Delta vcrD2$ ). These results indicate that both *vtrA* and *vtrB* are essential for T3SS2-dependent cytotoxicity.

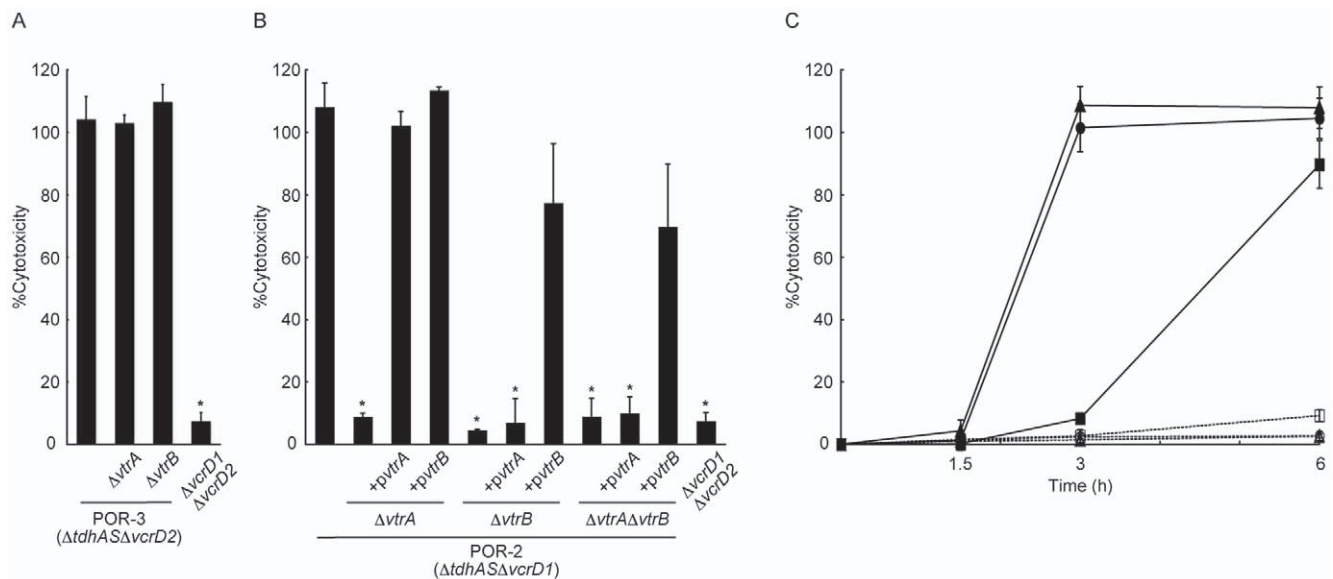

**Figure 4. VtrA and VtrB are not necessary for T3SS1-dependent cytotoxicity but necessary for T3SS2-dependent cytotoxicity.** A. *vtrA* and *vtrB* are not necessary for T3SS1-dependent cytotoxicity. Caco-2 cells were infected for 6 h with isogenic strains of POR-3 ( $\Delta tdhAS\Delta vcrD2$ ). Bar 1: POR-3 ( $\Delta tdhAS\Delta vcrD2$ ); bar 2: POR-3 $\Delta vtrA$ ; bar 3: POR-3 $\Delta vtrB$ ; bar 4:  $\Delta vcrD1\Delta vcrD2$  ( $\Delta tdhAS\Delta vcrD1\Delta vcrD2$ ). Cytotoxicity was evaluated by the amount of LDH released. Error bars represent standard deviations for results from triplicate experiments. B. *vtrA* and *vtrB* are essential for T3SS2-dependent cytotoxicity. Caco-2 cells were infected for 6 h with isogenic mutant strains of POR-2 ( $\Delta tdhAS\Delta vcrD1$ ). Bar 1: POR-2 ( $\Delta tdhAS\Delta vcrD1$ ); bar 2: POR-2 $\Delta vtrA$  ( $\Delta tdhAS\Delta vcrD1\Delta vtrA$ ); bar 3: POR-2 $\Delta vtrA$  expressing *vtrA* (POR-2 $\Delta vtrA$ +*pvtrA*); bar 4: POR-2 $\Delta vtrA$  expressing *vtrB* (POR-2 $\Delta vtrA$ +*pvtrB*); bar 5: POR-2 $\Delta vtrB$  ( $\Delta tdhAS\Delta vcrD1\Delta vtrB$ ); bar 6: POR-2 $\Delta vtrB$  expressing *vtrA* (POR-2 $\Delta vtrB$ +*pvtrA*); bar 7: POR-2 $\Delta vtrB$  expressing *vtrB* (POR-2 $\Delta vtrB$ +*pvtrB*); bar 8: POR-2 $\Delta vtrA\Delta vtrB$  ( $\Delta tdhAS\Delta vcrD1\Delta vtrA\Delta vtrB$ ); bar 9: POR-2 $\Delta vtrA\Delta vtrB$  expressing *vtrA* (POR-2 $\Delta vtrA\Delta vtrB$ +*pvtrA*); bar 10: POR-2 $\Delta vtrA\Delta vtrB$  expressing *vtrB* (POR-2 $\Delta vtrA\Delta vtrB$ +*pvtrB*); bar 11:  $\Delta vcrD1\Delta vcrD2$  ( $\Delta tdhAS\Delta vcrD1\Delta vcrD2$ ). Cytotoxicity was evaluated by the amount of LDH released. Error bars represent standard deviations for results from triplicate experiments. Asterisks indicate significant differences from the results obtained with the parent strain (\* $P < 0.05$ ). C. Overexpressing of *vtrA* and *vtrB* promoted T3SS2-dependent cytotoxicity. Caco-2 cells were infected for 1.5–6 h with *V. parahaemolyticus*. Cytotoxicity was evaluated by the amount of LDH released. POR-2 ( $\Delta tdhAS\Delta vcrD1$ ) with control vector (pSA19CP-MCS) (filled squares, solid line), POR-2 expressing *vtrA* (filled circles, solid line), POR-2 expressing *vtrB* (filled triangles, solid line),  $\Delta vcrD1\Delta vcrD2$  ( $\Delta tdhAS\Delta vcrD1\Delta vcrD2$ ) with control vector (pSA19CP-MCS) (open squares, dashed line),  $\Delta vcrD1\Delta vcrD2$  expressing *vtrA* (open circles, dashed line), and  $\Delta vcrD1\Delta vcrD2$  expressing *vtrB* (open triangles, dashed line). Error bars represent standard deviations for results from triplicate experiments. Asterisks indicate significant differences from the results obtained with the parent strain (\* $P < 0.05$ ). doi:10.1371/journal.pone.0008678.g004

### VtrA and VtrB Play Critical Roles in *V. parahaemolyticus*-Induced Enterotoxicity

To investigate the contribution of *vtrA* and *vtrB* to the enterotoxicity of *V. parahaemolyticus*, we examined the T3SS2-dependent enterotoxic activity of the *vtrA* and *vtrB* deletion strains using the rabbit ileal loop model. As reported previously, POR-2, which is a *tdhAS*- and T3SS1-deficient strain, caused a high level of fluid accumulation [21,26]. This was dramatically decreased in *vtrA* and/or *vtrB* deletion strains (POR-2 $\Delta vtrA$ , POR-2 $\Delta vtrB$ , and POR-2 $\Delta vtrA\Delta vtrB$ ) and was similar to that of the  $\Delta vcrD1\Delta vcrD2$  strain and non-infected (NI) control (Fig. 5A). The decrease in enterotoxicity was restored by trans-complementation of each gene. As with T3SS2-dependent cytotoxicity shown in Fig. 4B, a defect in enterotoxicity of *vtrA* deletion strains (POR-2 $\Delta vtrA$  and POR-2 $\Delta vtrA\Delta vtrB$ ) was restored by vector-expressed *vtrB* (Fig. 5A). Similar to T3SS2-dependent enterotoxicity, both *vtrA* and *vtrB* greatly contributed to the wild-type *V. parahaemolyticus*-induced enterotoxicity, which has functional TDH and both T3SS1 and T3SS2 (Fig. 5B). The fluid accumulation that resulted after challenge with *vtrA* and/or *vtrB* deletion strains (WT $\Delta vtrA$ , WT $\Delta vtrB$ , and WT $\Delta vtrA\Delta vtrB$ ) was almost none, very similar to the NI control. Vector-expressed *vtrB* was able to restore the enterotoxicity to its full potential not only in the *vtrB* deletion strain, but also in *vtrA* deletion strains. These results indicate strongly that both *vtrA* and *vtrB* play critical roles in *V. parahaemolyticus*-induced enterotoxicity.

### VtrA and VtrB Specifically Regulate Genes Encoded in the Vp-PAI Region

To identify transcriptional targets of VtrA and VtrB on the complete chromosomes of *V. parahaemolyticus*, genome-wide transcriptional profiles of *vtrA* or *vtrB* deletion strains were compared with that of the wild-type strain (Fig. 6 and Table 1). Overview of the transcriptome microarray analysis revealed that most gene expressions were unaffected by deletion of the *vtrA* or the *vtrB* genes respectively (Fig. 6A, B, respectively). However, it was also obvious that genes located on a particular region of chromosome 2 were remarkably down-regulated in both *vtrA* and *vtrB* deletion strains (Fig. 6A, B; lined). Interestingly, this region is included in the Vp-PAI region (*vpa1309-vpa1396*) [19,20] and the transcription of both *tdhAS* genes and T3SS2-related genes were also decreased significantly in each of the mutant strains (Fig. 6C, D). The pattern of gene expression profile was almost similar between these two mutant strains. Expression of *vtrA* was not affected by *vtrB* gene deletion (−1.1 -fold change), which is in accordance with our previous observations that *vtrB* gene deletion did not have any effect on *vtrA* gene expression, as assessed by the reporter gene assay of *vtrA* and immunoblotting of VtrA (Fig. 3A, C). Only a few other genes encoded outside of the Vp-PAI region were affected (Table 1). These results suggest that these two proteins regulate gene expression in the Vp-PAI region in highly specific manners.

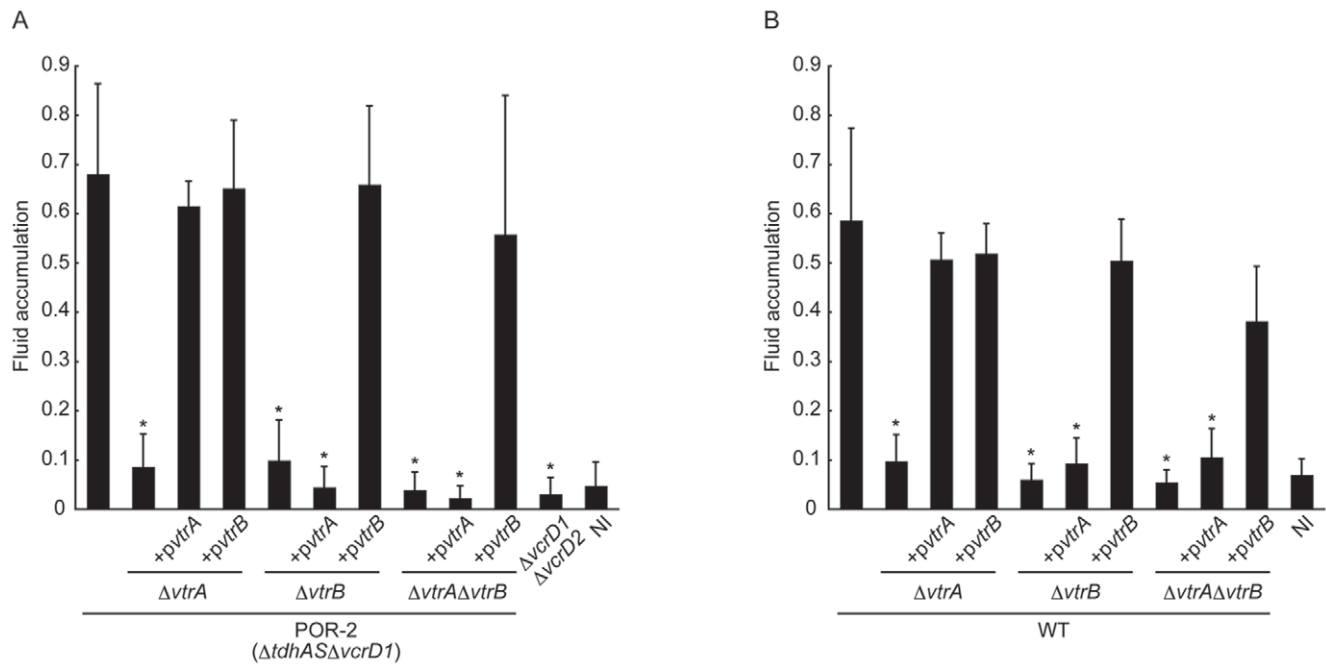

**Figure 5. VtrA and VtrB have a critical role in *V. parahaemolyticus*-induced enterotoxicity.** A. VtrA and VtrB are essential for T3SS2-dependent enterotoxicity. The enterotoxic activity levels of isogenic mutants of POR-2 ( $\Delta tdhAS\Delta vcrD1$ ) and complemented strains in rabbit ileal loops were examined. Bar 1, POR-2 ( $\Delta tdhAS\Delta vcrD1$ ); bar 2, POR-2 $\Delta vtrA$  ( $\Delta tdhAS\Delta vcrD1\Delta vtrA$ ); bar 3, POR-2 $\Delta vtrA$  expressing *vtrA* (POR-2 $\Delta vtrA$ +*pvtrA*); bar 4, POR-2 $\Delta vtrA$  expressing *vtrB* (POR-2 $\Delta vtrA$ +*pvtrB*); bar 5, POR-2 $\Delta vtrB$  ( $\Delta tdhAS\Delta vcrD1\Delta vtrB$ ); bar 6, POR-2 $\Delta vtrB$  expressing *vtrA* (POR-2 $\Delta vtrB$ +*pvtrA*); bar 7, POR-2 $\Delta vtrB$  expressing *vtrB* (POR-2 $\Delta vtrB$ +*pvtrB*); bar 8, POR-2 $\Delta vtrA\Delta vtrB$  ( $\Delta tdhAS\Delta vcrD1\Delta vtrA\Delta vtrB$ ); bar 9, POR-2 $\Delta vtrA\Delta vtrB$  expressing *vtrA* (POR-2 $\Delta vtrA\Delta vtrB$ +*pvtrA*); bar 10, POR-2 $\Delta vtrA\Delta vtrB$  expressing *vtrB* (POR-2 $\Delta vtrA\Delta vtrB$ +*pvtrB*); bar 11,  $\Delta vcrD1\Delta vcrD2$  ( $\Delta tdhAS\Delta vcrD1\Delta vcrD2$ ); bar 12, non-infected (NI) control. Results were measured as the amount of accumulated fluid (in milliliters) per length (in centimeters) of ligated rabbit small intestine. Error bars represent standard deviations for results from triplicate experiments. Asterisks indicate significant differences from the results obtained with the parental strain ( $P < 0.05$ ). B. VtrA and VtrB are essential for *V. parahaemolyticus*-induced enterotoxicity. The enterotoxic activity of isogenic mutants of wild-type *V. parahaemolyticus* (WT) and complemented strains in rabbit ileal loops were examined. Bar 1, wild-type (WT); bar 2, WT $\Delta vtrA$ ; bar 3, WT $\Delta vtrA$  expressing *vtrA* (WT $\Delta vtrA$ +*pvtrA*); bar 4, WT $\Delta vtrA$  expressing *vtrB* (WT $\Delta vtrA$ +*pvtrB*); bar 5, WT $\Delta vtrB$ ; bar 6, WT $\Delta vtrB$  expressing *vtrA* (WT $\Delta vtrB$ +*pvtrA*); bar 7, WT $\Delta vtrB$  expressing *vtrB* (WT $\Delta vtrB$ +*pvtrB*); bar 8, WT $\Delta vtrA\Delta vtrB$ ; bar 9, WT $\Delta vtrA\Delta vtrB$  expressing *vtrA* (WT $\Delta vtrA\Delta vtrB$ +*pvtrA*); bar 10, WT $\Delta vtrA\Delta vtrB$  expressing *vtrB* (WT $\Delta vtrA\Delta vtrB$ +*pvtrB*); bar 11, NI control. Error bars represent standard deviations for results from triplicate experiments. Asterisks indicate significant differences from the results obtained with the parental strain ( $P < 0.05$ ). doi:10.1371/journal.pone.0008678.g005

## Discussion

*Vibrio parahaemolyticus* is a gram-negative marine bacterium that causes acute gastroenteritis in humans [1,2]. TDH has been considered a major virulence factor of gastroenteritis, because TDH is responsible for KP (a marker of pathogenic strains) and has cytotoxic and enterotoxigenic activities [8,15,27,28,29,30,31,32]. Whole genome sequencing of this KP-positive strain revealed the presence of two sets of genes encoding for two separate type III secretion systems (T3SS1 and T3SS2)[18]. The T3SS1 gene cluster is found in both KP-negative and -positive strains, while the T3SS2 gene cluster is highly associated with KP-positive strains [21]. A functional characterization of T3SS2 has revealed that it is associated with cytotoxic activity against Caco-2 cells *in vitro* [25,26]. Furthermore, the enterotoxigenicity observed for a *tdhAS* deletion mutant strain was not observed for a T3SS2-deficient mutant strain [21,26,33]. Therefore, T3SS2 is also thought to be related to the enterotoxigenicity of *V. parahaemolyticus*. Comparative genomic analysis using microarrays to analyze both pathogenic and non-pathogenic strains, revealed that only the genes in the 80-kb pathogenicity island (Vp-PAI) on chromosome II, including two *tdh* genes (*tdhAS*) and a set of type III secretion system (T3SS2), were detected only in the KP-positive pathogenic strains [19,20]. Therefore, it has been considered that the genes encoded in the 80-kb pathogenicity island (Vp-PAI) play major roles in the

pathogenicity of this bacterium. However, the regulatory mechanisms for such genes are poorly understood. In this study, we found that two novel ToxR-like transcriptional regulatory proteins (VtrA; VPA1332 and VtrB; VPA1348), which are encoded in the Vp-PAI region, played important roles in pathogenicity (enterotoxigenicity) of *V. parahaemolyticus*, controlling virulence genes in the Vp-PAI region (including *tdh* and T3SS2-related genes) expression. These findings strongly indicated that this pathogen equips refined virulence gene expression system to cause gastroenteritis in humans and that these regulators are key players in the virulence of this bacterium.

Recently, a T3SS2-related T3SS gene cluster was found in *trh* (TDH-related hemolysin)-positive (KP-negative) *V. parahaemolyticus* strain TH3996, which is also pathogenic to humans. These T3SS-related genes are highly associated among *trh*-positive strains [34]. The T3SS2-related T3SS gene cluster is also encoded in a flanking region of the *trh* gene on chromosome II, which is called Vp-PAI<sub>TH3996</sub>, and not only TRH but also the T3SS-related genes in Vp-PAI<sub>TH3996</sub> are involved in the enterotoxigenicity of *trh*-positive strains [34]. Moreover, a T3SS2-related gene cluster was also found in non-O1, non-O139 *V. cholerae* strains, and it was required for colonization in the infant mouse model [35,36]. Therefore, genes in the Vp-PAI region, especially those encoding for hemolysins and T3SS2, have been considered to be related to the pathogenicity of not only *V. parahaemolyticus* but also non-O1,

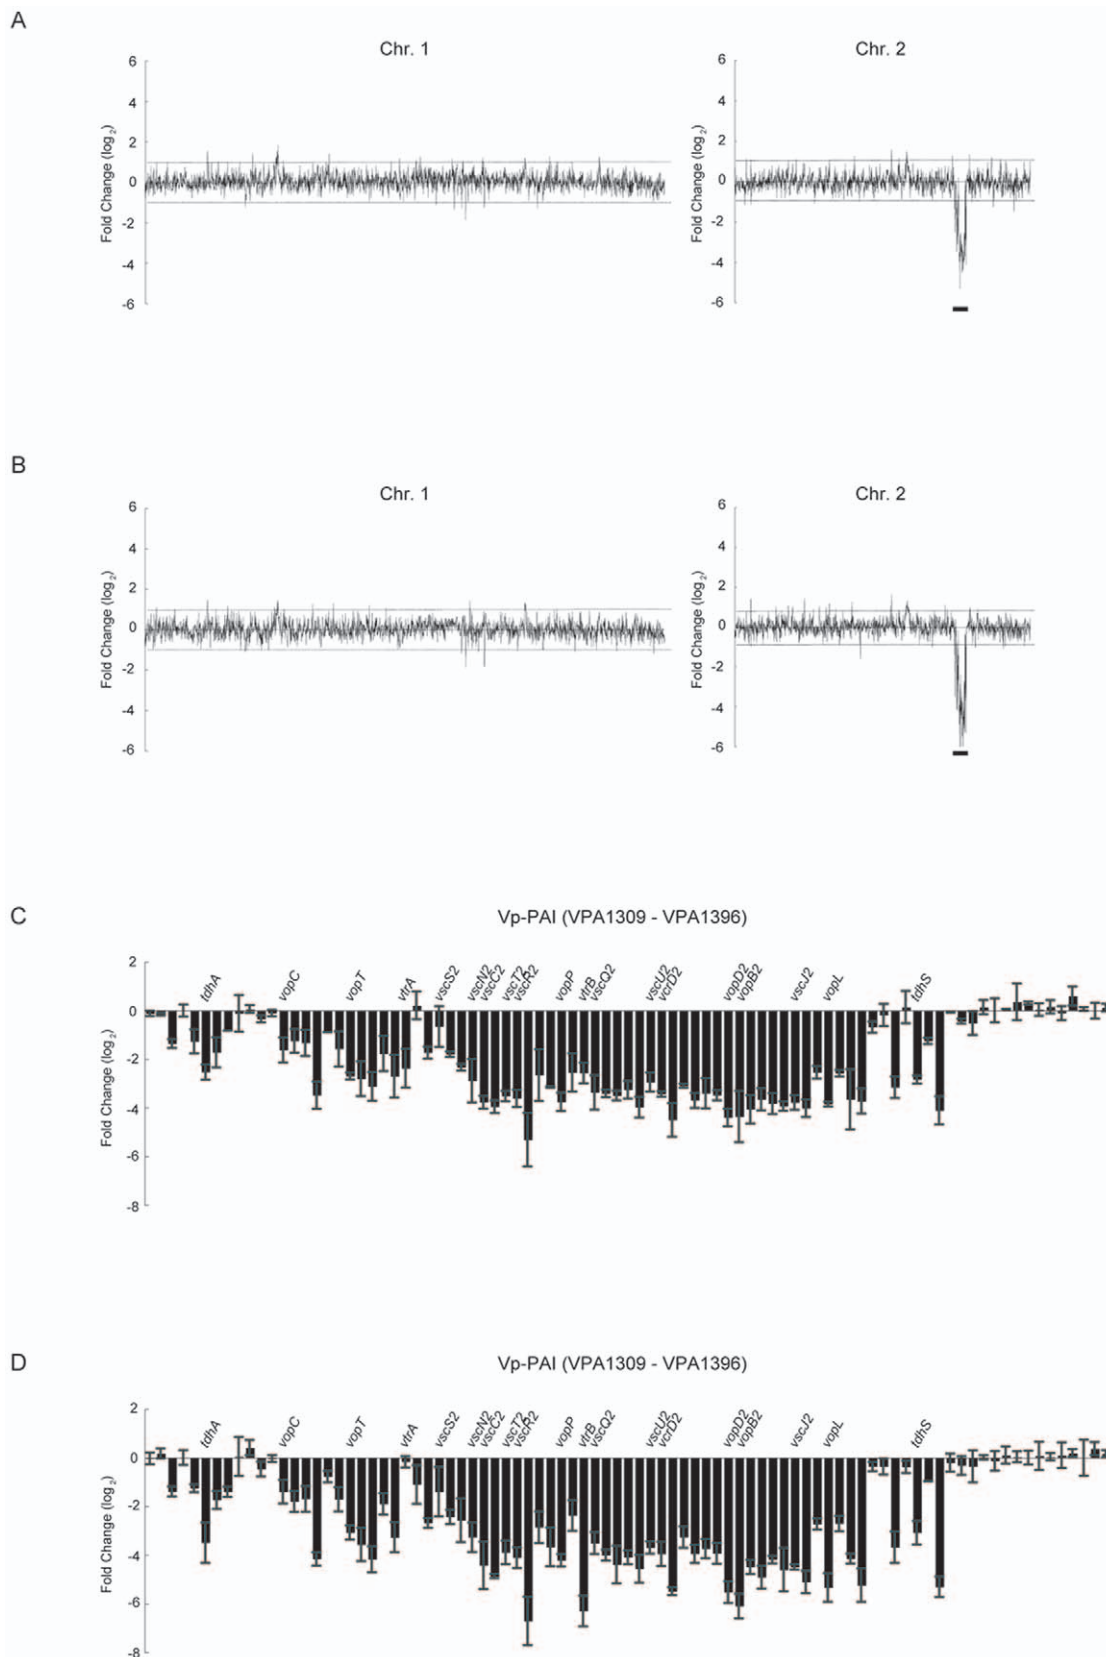

**Figure 6. Whole-genome transcriptional profiling of *vtrA* and *vtrB* deletion strain.** Genome-wide transcript analysis of the *VtrA* and *VtrB* regulons is shown. Gene expression was determined by comparing cDNA generated from  $WT\Delta vtrA$  (A) or  $WT\Delta vtrB$  (B) in exponential phase grown in LB medium with 0.5% NaCl with that from the WT strain. The Vp-PAI region is indicated by a bold line. Effect of the *vtrA* (C) or *vtrB* (D) deletion on expression of genes located within Vp-PAI (*vpa1309-vpa1396*). Representative gene functions are indicated at the top. doi:10.1371/journal.pone.0008678.g006

**Table 1.** Microarray analysis of VtrA and VtrB regulon in *V. parahaemolyticus*.

| Identification                               | ORF Description                                              | Fold change <sup>a</sup> |               |
|----------------------------------------------|--------------------------------------------------------------|--------------------------|---------------|
|                                              |                                                              | vtrA                     | vtrB          |
| Downregulated genes (VtrA or VtrB-activated) |                                                              |                          |               |
| VP0047                                       | peptide ABC transporter, ATP-binding protein                 | -1.6                     | <b>-2.0</b>   |
| VP1880                                       | L-serine dehydratase 1                                       | -1.4                     | <b>-2.2</b>   |
| VP1904                                       | methyl-accepting chemotaxis protein                          | <b>-3.6</b>              | -3.6          |
| VP2015                                       | putative cytochrome c                                        | -2.1                     | <b>-3.4</b>   |
| VP2016                                       | hypothetical protein                                         | <b>-2.4</b>              | -2.4          |
| VP2362                                       | outer membrane protein OmpK precursor                        | -2.0                     | <b>-2.0</b>   |
| VP2679                                       | ribosomal large subunit pseudouridine synthase A             | -1.5                     | <b>-2.0</b>   |
| VPA1311                                      | hypothetical protein                                         | -2.6                     | <b>-2.6</b>   |
| VPA1313                                      | hypothetical protein                                         | -2.4                     | <b>-2.4</b>   |
| VPA1314                                      | thermostable direct hemolysin A                              | <b>-5.8</b>              | <b>-11.3</b>  |
| VPA1315                                      | hypothetical protein                                         | -3.3                     | <b>-3.3</b>   |
| VPA1321                                      | cytotoxic necrotizing factor                                 | <b>-3.1</b>              | -3.1          |
| VPA1322                                      | putative zinc finger protein                                 | -2.4                     | <b>-3.5</b>   |
| VPA1323                                      | hypothetical protein                                         | -2.5                     | <b>-3.2</b>   |
| VPA1324                                      | hypothetical protein                                         | <b>-11.2</b>             | <b>-17.8</b>  |
| VPA1326                                      | hypothetical protein                                         | -3.0                     | <b>-3.3</b>   |
| VPA1327                                      | putative exoenzyme T                                         | <b>-6.5</b>              | <b>-8.4</b>   |
| VPA1328                                      | hypothetical protein                                         | <b>-7.0</b>              | <b>-11.9</b>  |
| VPA1329                                      | putative traA protein                                        | <b>-8.7</b>              | <b>-18.0</b>  |
| VPA1330                                      | hypothetical protein                                         | -3.4                     | <b>-3.7</b>   |
| VPA1331                                      | putative OspC2                                               | <b>-6.5</b>              | <b>-9.6</b>   |
| VPA1332                                      | VtrA protein                                                 | -5.2                     | -1.1          |
| VPA1334                                      | hypothetical protein                                         | <b>-3.3</b>              | <b>-6.4</b>   |
| VPA1336                                      | hypothetical protein                                         | <b>-3.5</b>              | <b>-5.4</b>   |
| VPA1337                                      | hypothetical protein                                         | <b>-5.0</b>              | <b>-5.0</b>   |
| VPA1338                                      | putative ATPase YscN                                         | <b>-7.4</b>              | <b>-9.6</b>   |
| VPA1339                                      | putative type III secretion system EscC protein              | <b>-13.7</b>             | <b>-21.5</b>  |
| VPA1340                                      | hypothetical protein                                         | <b>-15.5</b>             | <b>-29.2</b>  |
| VPA1341                                      | putative Spa29, component of the Mxi-Spa secretion machinery | <b>-11.5</b>             | <b>-14.8</b>  |
| VPA1342                                      | putative Type III secretion protein Spa24                    | <b>-12.3</b>             | <b>-17.3</b>  |
| VPA1343                                      | hypothetical protein                                         | <b>-39.7</b>             | <b>-104.7</b> |
| VPA1344                                      | hypothetical protein                                         | -6.3                     | <b>-7.3</b>   |
| VPA1345                                      | hypothetical protein                                         | <b>-8.9</b>              | <b>-12.7</b>  |
| VPA1346                                      | putative targeted effector protein YopP                      | <b>-13.5</b>             | <b>-18.5</b>  |
| VPA1347                                      | hypothetical protein                                         | <b>-5.9</b>              | <b>-5.2</b>   |
| VPA1348                                      | VtrB protein                                                 | <b>-5.9</b>              | <b>-78.8</b>  |
| VPA1349                                      | putative Type III secretion protein Spa33                    | <b>-10.4</b>             | <b>-11.4</b>  |
| VPA1350                                      | hypothetical protein                                         | <b>-10.7</b>             | <b>-16.0</b>  |
| VPA1351                                      | hypothetical protein                                         | <b>-11.3</b>             | <b>-21.0</b>  |
| VPA1352                                      | hypothetical protein                                         | <b>-9.6</b>              | <b>-17.0</b>  |
| VPA1353                                      | putative outer membrane protein                              | <b>-15.7</b>             | <b>-23.7</b>  |
| VPA1354                                      | putative type III secretion system EscU protein              | <b>-7.7</b>              | <b>-12.9</b>  |
| VPA1355                                      | putative type III secretion system EscV protein              | <b>-10.8</b>             | <b>-15.5</b>  |
| VPA1356                                      | hypothetical protein                                         | <b>-22.7</b>             | <b>-44.8</b>  |

**Table 1.** Cont.

| Identification                             | ORF Description                                               | Fold change <sup>a</sup> |              |
|--------------------------------------------|---------------------------------------------------------------|--------------------------|--------------|
|                                            |                                                               | vtrA                     | vtrB         |
| VPA1357                                    | hypothetical protein                                          | -8.6                     | <b>-7.3</b>  |
| VPA1358                                    | putative dimethyladenosine transferase                        | <b>-13.0</b>             | <b>-15.4</b> |
| VPA1359                                    | hypothetical protein                                          | <b>-10.6</b>             | <b>-13.3</b> |
| VPA1360                                    | hypothetical protein                                          | <b>-11.2</b>             | <b>-15.2</b> |
| VPA1361                                    | hypothetical protein                                          | <b>-21.2</b>             | <b>-46.1</b> |
| VPA1362                                    | putative secreted protein EspD                                | <b>-20.6</b>             | <b>-68.5</b> |
| VPA1363                                    | putative chaperone                                            | <b>-16.7</b>             | <b>-22.5</b> |
| VPA1364                                    | hypothetical protein                                          | <b>-12.6</b>             | <b>-30.0</b> |
| VPA1365                                    | putative two-component response regulator                     | <b>-14.2</b>             | <b>-18.2</b> |
| VPA1366                                    | hypothetical protein                                          | <b>-15.3</b>             | <b>-24.3</b> |
| VPA1367                                    | putative type III secretion system lipoprotein precursor EprK | <b>-13.8</b>             | <b>-22.4</b> |
| VPA1368                                    | hypothetical protein                                          | <b>-16.2</b>             | <b>-34.5</b> |
| VPA1369                                    | hypothetical protein                                          | <b>-5.8</b>              | <b>-6.6</b>  |
| VPA1370                                    | hypothetical protein                                          | <b>-14.4</b>             | <b>-40.3</b> |
| VPA1371                                    | hypothetical protein                                          | <b>-6.0</b>              | <b>-6.5</b>  |
| VPA1373                                    | hypothetical protein                                          | <b>-13.2</b>             | <b>-37.8</b> |
| VPA1376                                    | conserved hypothetical protein                                | <b>-8.9</b>              | <b>-12.8</b> |
| VPA1378                                    | thermostable direct hemolysin S                               | <b>-7.2</b>              | <b>-8.5</b>  |
| VPA1380                                    | putative OspB protein                                         | <b>-17.3</b>             | <b>-39.5</b> |
| Upregulated genes (VtrA or VtrB-repressed) |                                                               |                          |              |
| VP0368                                     | mannitol operon repressor                                     | 1.9                      | <b>2.1</b>   |
| VP0996                                     | putative 54 kDa polar flagellar sheath protein A              | <b>2.0</b>               | 2.0          |
| VPA0548                                    | putative protein F-related protein                            | 1.7                      | <b>2.0</b>   |

<sup>a</sup>Fold change in gene transcripts between the wild-type and  $\Delta vtrA$  or  $\Delta vtrB$  mutant as determined by microarray analysis. Statistically significant changes ( $\geq 2$ -fold difference with  $P < 0.05$ ) are highlighted in bold as described in *Materials and Methods*.

doi:10.1371/journal.pone.0008678.t001

non-O139 *V. cholerae* to humans. The T3SS gene set found in these strains contains a pair that is highly similar to the *vtrA* and *vtrB* genes, suggesting that these regulators might contribute to the virulence of these bacteria by controlling virulence gene expression levels.

The transcriptional activator ToxR controls the expression of the genes for CT, TCP, and outer membrane proteins in *V. cholerae* [23]. ToxR is an integral membrane protein and consists of three functional domains: cytoplasmic domain, transmembrane domain and periplasmic domain [37]. The N-terminal cytoplasmic domain of ToxR encodes an OmpR-like DNA-binding domain that is essential for transcriptional regulation of ToxR-regulated genes [37]. The transmembrane (TM) and periplasmic domains of ToxR are believed to act as sensors of environmental signals [38]. The N-terminal portions of VtrA and VtrB share sequence similarity with the DNA binding domain of ToxR. The TM-PRED program (<http://www.ch.embnet.org/cgi-bin/TMPRED>) from parser; TM helix length between 17 and 33 residues; scores,  $>1,000$ ) predicted that VtrA and VtrB would contain one TM region (VtrA, amino acids 134–153 and VtrB, amino acids 157–182), indicating that VtrA and VtrB are transmembrane transcriptional activators. The TM region of VtrB is located on its C-terminal end, whereas that of VtrA is located on the middle



region as ToxR. Although the C-terminal region of VtrA did not show significant sequence homology with ToxR, it is possible that it might be involved in receiving and transmitting environmental signals to elicit VtrA-mediated regulation. This signal transduction could exert virulence in *V. parahaemolyticus*.

*V. parahaemolyticus* has a homolog of *V. cholerae* *toxRS* operon (Vp-ToxRS), and Vp-ToxR is involved in the production of TDH [39]. Recently, Nakano *et al.* reported that Hfq, which is conserved in a wide range of bacteria and modulates the stability and transcription of mRNAs, also regulates TDH expression in *V. parahaemolyticus* [40]. In our investigation, expression levels of *vp-toxR* and *hfq* were not significantly affected by deletion of *vtrA* and *vtrB* genes under our experimental conditions (GSE17242), suggesting that neither *vp-toxR* nor *hfq* is involved in TDH expression mediated by VtrA and VtrB. It is not surprising that VtrA and VtrB are regulons, because both Vp-ToxR and Hfq are global regulators and their regulons comprise many genes, including virulence-associated genes [23,41]. Because VtrA and VtrB regulons were specifically clustered in the Vp-PAI region (Fig. 6 and Table 1), it is possible that they are more directly related to the control of pathogenicity than Vp-ToxR and Hfq.

Genome-wide transcriptional profiling of *vtrA* or *vtrB* deletion strains revealed that VtrA and VtrB regulons were specifically encoded in the Vp-PAI region (Fig. 6 and Table 1). Given our findings that the expression of *vtrB* is under control of VtrA (Fig. 3) and that vector-expressed *vtrB* could restore the defect in enterotoxicity of the WT $\Delta$ *vtrA* $\Delta$ *vtrB* strain (Fig. 5B), VtrB might determine this specific gene expression. The G+C content of the Vp-PAI region of *V. parahaemolyticus* is lower than the average G+C content of the small chromosome (ChrII) [18,19]. Although a consensus sequence recognized by VtrB is unknown, it is possible that this characteristic of low G+C content in Vp-PAI might be one of the factors deciding the specificity of VtrB regulons. Given that the Vp-PAI sequence is unique to KP-positive pathogenic strains, plays an important role in the pathogenicity of *V. parahaemolyticus* and that VtrB has a critical role in the expression of genes from this region, VtrB may be considered a key player in the virulence of this bacterium. Therefore, it could be an ‘‘Achilles’ heel’’ of this pathogen. It is possible that VtrB-specific drugs would perform well in the prevention and treatment of *V. parahaemolyticus*-induced illness.

## Materials and Methods

### Bacterial Strains and Plasmids

*V. parahaemolyticus* strain RIMD2210633 (KP positive, serotype O3:K6) [18] was used for constructing deletion mutants and in functional analysis. *E. coli* DH5 $\alpha$  and SM10 $\lambda$ *pir* were used for general manipulation of plasmids and mobilization of plasmids into *V. parahaemolyticus*. *E. coli* MC4100 was used for reporter gene assay. The strains and plasmids used in this study are listed in Table 2.

### RNA Isolation

Bacterial strains were grown at 37°C in LB broth containing 0.5% NaCl to an OD<sub>600</sub> of 1.0. Bacteria were harvested by centrifugation and the bacterial pellet was suspended with TRIzol Reagent (Invitrogen). After 1 h incubation at 4°C, one-fifth volume of chloroform was added to the suspension followed by recentrifugation. The aqueous layer was removed and a one-tenth volume of 3 M sodium acetate (pH 5.9) was added. Nucleic acids were precipitated with isopropanol and pelleted by centrifugation. The pellet was washed with 80% ethanol. Contaminating genomic DNA was removed from the RNA samples using Turbo DNA-free

kits (Ambion). RNA was purified by acid phenol-chloroform extraction and ethanol precipitation. Finally, highly pure total RNA was further isolated using QIAGEN RNeasy Mini kits, according to the manufacturer’s protocol.

### DNA Microarray

A total of 20  $\mu$ g of RNA was transcribed to DNA and labeled with aminoallyl dUTP using reverse transcriptase (Superscript III; Invitrogen) and random hexamers (TAKARA Bio) as primers. The aminoallyl-labeled DNA was purified by phenol chloroform extraction and ethanol precipitation. Precipitated DNA was resolved in 50 mM NaHCO<sub>3</sub> (pH 9.0) and Cy3 or Cy5 monofunctional dye (GE Healthcare) was added to the solution. After 1 h incubation, unincorporated dye was removed using CentriSep spin columns (Princeton Separations, Inc.). Hybridization and detection of microarray signals was performed as described [19]. Equal volumes of Cy3- or Cy5-labeled probes from wild type and WT  $\Delta$ *vtrA* or WT  $\Delta$ *vtrB* *V. parahaemolyticus* strain were mixed with in hybridization solution (5 $\times$ SSC buffer, 0.5% SDS, 0.1 mg/ml human Cot-1 DNA). Mixtures were heated for 5 min at 95°C, followed by ice incubation. The probe mixtures were applied to a microarray slides and covered with MAUI AO lids (BioMicro Systems). Microarray slides were incubated for 16 h at 55°C in a MAUI hybridization chamber. After hybridization, the microarray slides were washed and scanned using a Scan Array Express Lite (Perkin Elmer Life and Analytical Sciences). Each experiment was repeated in triplicates. Microarray data were analyzed using ScanArray Express software (Perkin Elmer Life and Analytical Sciences). The genes regulated by *vtrA* or *vtrB* were defined as genes that exhibited at least 2-fold difference on WT $\Delta$ *vtrA* or WT $\Delta$ *vtrB* in three experiments. All data were filtered for statistical significance ( $P < 0.05$ ) using *t*-tests in MultiExperiment Viewer (<http://www.tm4.org/mev.html>). Array results are available at the NCBI Gene Expression Omnibus database (GEO; <http://www.ncbi.nlm.nih.gov/geo/>) under the accession number GSE17242.

### Immunoblot Analysis

*V. parahaemolyticus* strains were grown overnight in LB broth with 0.5% NaCl. Cultures were then diluted 1:100 into LB broth with 0.5% NaCl and grown with shaking at 37°C for 5 h. After incubation, bacterial cultures were centrifuged and bacterial pellets solubilized with Laemmli buffer. Secreted proteins were harvested by precipitation with cold trichloroacetic acid to a final concentration of 10% (v/v) on ice for 60 min, followed by centrifugation at 48,000 *g* for 60 min. The pellets were rinsed in cold acetone and then solubilized in Laemmli buffer.

Samples for western blot analysis were separated by SDS-PAGE (10%, 10–20%, or 15–25% gradients of polyacrylamide; COSMO BIO). The transferred membrane was probed with anti-VscC1, anti-VopD1, anti-VepA, anti-VscC2, anti-VopD2, anti-VopC, anti-TDH, anti-VPA1342, anti-VtrA, or anti-VtrB rabbit polyclonal antibodies and then probed with horseradish peroxidase-conjugated goat anti-rabbit antibody (ZYMED). The blots were developed using enhanced chemiluminescence (ECL) western blotting kits (GE healthcare).

### Reporter Gene Assays

*E. coli* MC4100 or *V. parahaemolyticus* strains, each harboring a reporter plasmid were grown for 1 h at 37°C in LB broth containing 1.0 or 0.5% NaCl.  $\beta$ -galactosidase activity was assayed in cell lysates by Miller’s method using *o*-nitrophenyl- $\beta$ -D-galactopyranoside (ONPG) as a substrate [42].

**Table 2.** Strains and plasmids used in this study.

| Strain or plasmid                             | Description                                                                                                                                                                      | Source or reference   |
|-----------------------------------------------|----------------------------------------------------------------------------------------------------------------------------------------------------------------------------------|-----------------------|
| <i>Vibrio parahaemolyticus</i>                |                                                                                                                                                                                  |                       |
| WT                                            | RIMD2210633 (KP positive, serotype O3:K6)                                                                                                                                        | [18]                  |
| POR-1                                         | $\Delta$ <i>tdhA5</i> derivative of WT                                                                                                                                           | [21]                  |
| POR-2                                         | POR-1 knockout of <i>vcrD1</i> ( <i>vp1696</i> ) gene                                                                                                                            | [21]                  |
| POR-3                                         | POR-1 knockout of <i>vcrD2</i> ( <i>vpa1355</i> ) gene                                                                                                                           | [21]                  |
| $\Delta$ <i>vcrD1\Delta</i> <i>vcrD2</i>      | POR-1 knockout of <i>vcrD1</i> and <i>vcrD2</i> gene                                                                                                                             | [25]                  |
| WT $\Delta$ <i>vtrA</i>                       | KXV237 knockout of <i>vtrA</i> ( <i>vp1332</i> ) gene                                                                                                                            | This study            |
| WT $\Delta$ <i>vtrB</i>                       | KXV237 knockout of <i>vtrB</i> ( <i>vp1348</i> ) gene                                                                                                                            | This study            |
| WT $\Delta$ <i>vtrA \Delta</i> <i>vtrB</i>    | KXV237 knockout of <i>vtrA</i> and <i>vtrB</i> gene                                                                                                                              | This study            |
| POR-2 $\Delta$ <i>vtrA</i>                    | POR-2 knockout of <i>vtrA</i> ( <i>vp1332</i> ) gene                                                                                                                             | This study            |
| POR-2 $\Delta$ <i>vtrB</i>                    | POR-2 knockout of <i>vtrB</i> ( <i>vp1348</i> ) gene                                                                                                                             | This study            |
| POR-2 $\Delta$ <i>vtrA \Delta</i> <i>vtrB</i> | POR-2 knockout of <i>vtrA</i> and <i>vtrB</i> gene                                                                                                                               | This study            |
| POR-3 $\Delta$ <i>vtrA</i>                    | POR-3 knockout of <i>vtrA</i> ( <i>vp1332</i> ) gene                                                                                                                             | This study            |
| POR-3 $\Delta$ <i>vtrB</i>                    | POR-3 knockout of <i>vtrB</i> ( <i>vp1348</i> ) gene                                                                                                                             | This study            |
| $\Delta$ <i>vscC1</i>                         | POR-1 knockout of <i>vscC1</i> ( <i>vp1696</i> ) gene                                                                                                                            | [21]                  |
| POR-4                                         | POR-1 knockout of <i>vopD1</i> ( <i>vp1656</i> ) gene                                                                                                                            | [43]                  |
| POR-10                                        | POR-1 knockout of <i>vopA</i> ( <i>vp1680</i> ) gene                                                                                                                             | [43]                  |
| $\Delta$ <i>vscC2</i>                         | POR-1 knockout of <i>vscC2</i> ( <i>vpa1339</i> ) gene                                                                                                                           | [21]                  |
| POR-2 $\Delta$ <i>vopD2</i>                   | POR-2 knockout of <i>vopD2</i> ( <i>vp1361</i> ) gene                                                                                                                            | [26]                  |
| POR-2 $\Delta$ <i>vopC</i>                    | POR-2 knockout of <i>vopC</i> ( <i>vpa1321</i> ) gene                                                                                                                            | [25]                  |
| POR-2 $\Delta$ <i>vpa1343</i>                 | POR-2 knockout of <i>vpa1343</i> gene                                                                                                                                            | This study            |
| <i>Escherichia coli</i>                       |                                                                                                                                                                                  |                       |
| DH5 $\alpha$                                  | F <sup>-</sup> $\Phi$ 80 $\Delta$ <i>lacZM15 \Delta</i> ( <i>lacZYA argF</i> )U169 <i>deoP recA1 endA1 hsdR17</i> ( <i>r<sub>K</sub><sup>-</sup> m<sub>K</sub><sup>-</sup></i> ) | Laboratory collection |
| SM10 $\lambda$ . <i>pir</i>                   | <i>thi thr leu tonA lacY supE recA::RP4-2-Tc::Mu \lambda.pir</i> R6K                                                                                                             | [24]                  |
| MC4100                                        | F <sup>-</sup> <i>araD139 \Delta</i> ( <i>argF-lac</i> ) U169 <i>rpsL150</i> (Str <sup>r</sup> ) <i>relA1 flbB5301 deoC1 ptsF25 rbsR</i>                                         | [44]                  |
| <b>Plasmid</b>                                |                                                                                                                                                                                  |                       |
| pHRP309                                       | <i>lacZ</i> transcriptional fusion vector, Gm <sup>r</sup>                                                                                                                       | [45]                  |
| p309-Pro- <i>vtrA</i>                         | Derivative of pHRP309, containing <i>vtrA</i> promoter                                                                                                                           | This study            |
| p309-Pro- <i>vtrB</i>                         | Derivative of pHRP309, containing <i>vtrB</i> promoter                                                                                                                           | This study            |
| pYAK1                                         | R6K-ori suicide vector containing <i>sacB</i> gene                                                                                                                               | [46]                  |
| pYAK1- $\Delta$ <i>vtrA</i>                   | Derivative of suicide vector pYAK1 for generating the <i>vtrA</i> deletion mutants                                                                                               | This study            |
| pYAK1- $\Delta$ <i>vtrB</i>                   | Derivative of suicide vector pYAK1 for generating the <i>vtrB</i> deletion mutants                                                                                               | This study            |
| pYAK1- $\Delta$ <i>vpa1343</i>                | Derivative of suicide vector pYAK1 for generating the <i>vpa1343</i> deletion mutants                                                                                            | This study            |
| pSA19CP-MCS                                   | Complement vector for <i>V. parahaemolyticus</i> , Cm <sup>r</sup>                                                                                                               | [47]                  |
| <i>vtrA</i>                                   | Derivative of pSA19CP-MCS, containing <i>vtrA</i> gene                                                                                                                           | This study            |
| <i>vtrB</i>                                   | Derivative of pSA19CP-MCS, containing <i>vtrB</i> gene                                                                                                                           | This study            |

doi:10.1371/journal.pone.0008678.t002

### Electrophoretic Mobility Shift Assay (EMSA)

The promoter region of *vtrB*, containing a 284 bp upstream sequence of the start codon, was amplified by polymerase chain reaction (PCR). PCR products purified from agarose gels were then mixed with increasing concentrations of the purified DNA binding domains of VtrA (amino acids 1–133) and VtrB (amino acids 1–158) in a reaction buffer containing 10  $\mu$ g/ml of bovine serum albumin (BSA). After 30 min incubation at room temperature, samples were separated by 5% polyacrylamide nondenaturing gels in TAE buffer at room temperature. DNA was stained with SYBR Green I Nucleic Acid Gel Stain (Lonza) and visualized with a LAS-4000 mini EPUV (Fujifilm) at 460 nm emission wavelength.

### Cytotoxicity Assays

T3SS1 and T3SS2-dependent cytotoxicity assays were performed as described [25]. Briefly, Caco-2 cells were seeded at  $3 \times 10^4$  cells per well in 96-well plates and cultured for 48 h to confluency. The cells were co-cultured for 1.5–6 h with phosphate buffered saline (PBS)-washed bacteria at a multiplicity of infection (MOI) of 10. The release of lactate dehydrogenase (LDH) into the medium was quantified using CytoTox96 (Promega). The LDH release (percent cytotoxicity) was calculated using the following equation: (optical density at 490 nm [OD<sub>490</sub>] of experimental release – OD<sub>490</sub> of spontaneous release)/(OD<sub>490</sub> of maximum release – OD<sub>490</sub> of spontaneous release)  $\times$  100. Spontaneous release was taken to be the amount of LDH released from the cytoplasm

of uninfected cells, whereas the maximum release was the amount released by total lysis of uninfected cells.

### Rabbit Ileal Loop Test

*V. parahaemolyticus* strains were grown overnight in LB broth with 3% NaCl. Cultures were then diluted 1:100 into LB broth with 3% NaCl and grown with shaking for 5.5 h. After incubation, bacteria were harvested by centrifugation and suspended in LB broth with 0.5% NaCl. The bacterial suspensions ( $10^9$  CFU) were injected into the ligated ileal loops of rabbits, and fluid accumulation in each loop was measured at 16 h after challenge. The result was expressed as the amount of accumulated fluid (in milliliters) per length (in centimeters) of ligated rabbit small intestine. All animal experiments were performed according to an experimental protocol approved by the Ethics Review Committee for Animal

Experimentation of Research Institute for Microbial Diseases (Osaka University, Osaka, Japan).

### Statistical Analysis

All data are presented as the mean and standard deviation of three determinations per experimental condition. The statistical significance was determined by one-way ANOVA followed by Dunnett's multiple comparison test, and  $P < 0.05$  was considered statistically significant.

### Author Contributions

Conceived and designed the experiments: TK TI TH. Performed the experiments: TK KG MM. Analyzed the data: TK KG MM KI. Contributed reagents/materials/analysis tools: TK KG HH KI YA KSP. Wrote the paper: TK YA VC RD TI TH.

### References

- Blake PA, Weaver RE, Hollis DG (1980) Diseases of humans (other than cholera) caused by vibrios. *Annu Rev Microbiol* 34: 341–367.
- Morris JG Jr, Black RE (1985) Cholera and other vibrioses in the United States. *N Engl J Med* 312: 343–350.
- Hlady WG, Klontz KC (1996) The epidemiology of *Vibrio* infections in Florida, 1981–1993. *J Infect Dis* 173: 1176–1183.
- Daniels NA, MacKinnon L, Bishop R, Altekruse S, Ray B, et al. (2000) *Vibrio parahaemolyticus* infections in the United States, 1973–1998. *J Infect Dis* 181: 1661–1666.
- Miyamoto Y, Kato T, Obara Y, Akiyama S, Takizawa K, et al. (1969) In vitro hemolytic characteristic of *Vibrio parahaemolyticus*: its close correlation with human pathogenicity. *J Bacteriol* 100: 1147–1149.
- Honda T, Iida T (1993) The pathogenicity of *Vibrio parahaemolyticus* and the role of the thermostable direct haemolysin and related haemolysins. *Rev Med Microbiol* 4: 106–113.
- Nishibuchi M, Kaper JB (1995) Thermostable direct hemolysin gene of *Vibrio parahaemolyticus*: a virulence gene acquired by a marine bacterium. *Infect Immun* 63: 2093–2099.
- Honda T, Goshima K, Takeda Y, Sugino Y, Miwatani T (1976) Demonstration of the cardiotoxicity of the thermostable direct hemolysin (lethal toxin) produced by *Vibrio parahaemolyticus*. *Infect Immun* 13: 163–171.
- Honda T, Takeda Y, Miwatani T, Kato K, Nimura Y (1976) [Clinical features of patients suffering from food poisoning due to *Vibrio parahaemolyticus* - with special reference to changes in electrocardiograms]. *Kansenshogaku Zasshi* 50: 216–223.
- Sakurai J, Honda T, Jinguji Y, Arita M, Miwatani T (1976) Cytotoxic effect of the thermostable direct hemolysin produced by *Vibrio parahaemolyticus* on FL cells. *Infect Immun* 13: 876–883.
- Goshima K, Honda T, Hirata M, Kitkuchi K, Takeda Y (1977) Stopping of the spontaneous beating of mouse and rat myocardial cells in vitro by a toxin from *Vibrio parahaemolyticus*. *J Mol Cell Cardiol* 9: 191–213.
- Tang GQ, Iida T, Yamamoto K, Honda T (1995) Ca(2+)-independent cytotoxicity of *Vibrio parahaemolyticus* thermostable direct hemolysin (TDH) on Intestine 407, a cell line derived from human embryonic intestine. *FEMS Microbiol Lett* 134: 233–238.
- Tang G, Iida T, Yamamoto K, Honda T (1997) Analysis of functional domains of *Vibrio parahaemolyticus* thermostable direct hemolysin using monoclonal antibodies. *FEMS Microbiol Lett* 150: 289–296.
- Fabbri A, Falzano L, Frank C, Donelli G, Matarrese P, et al. (1999) *Vibrio parahaemolyticus* thermostable direct hemolysin modulates cytoskeletal organization and calcium homeostasis in intestinal cultured cells. *Infect Immun* 67: 1139–1148.
- Raimondi F, Kao JP, Fiorentini C, Fabbri A, Donelli G, et al. (2000) Enterotoxigenicity and cytotoxicity of *Vibrio parahaemolyticus* thermostable direct hemolysin in *in vitro* systems. *Infect Immun* 68: 3180–3185.
- Naim R, Yanagihara I, Iida T, Honda T (2001) *Vibrio parahaemolyticus* thermostable direct hemolysin can induce an apoptotic cell death in Rat-1 cells from inside and outside of the cells. *FEMS Microbiol Lett* 195: 237–244.
- Takahashi A, Iida T, Naim R, Naykaya Y, Honda T (2001) Chloride secretion induced by thermostable direct haemolysin of *Vibrio parahaemolyticus* depends on colonic cell maturation. *J Med Microbiol* 50: 870–878.
- Makino K, Oshima K, Kurokawa K, Yokoyama K, Uda T, et al. (2003) Genome sequence of *Vibrio parahaemolyticus*: a pathogenic mechanism distinct from that of *V. cholerae*. *Lancet* 361: 743–749.
- Izutsu K, Kurokawa K, Tashiro K, Kuhara S, Hayashi T, et al. (2008) Comparative genomic analysis using microarray demonstrates a strong correlation between the presence of the 80-kilobase pathogenicity island and pathogenicity in Kanagawa phenomenon-positive *Vibrio parahaemolyticus* strains. *Infect Immun* 76: 1016–1023.
- Sugiyama T, Iida T, Izutsu K, Park KS, Honda T (2008) Precise region and the character of the pathogenicity island in clinical *Vibrio parahaemolyticus* strains. *J Bacteriol* 190: 1835–1837.
- Park KS, Ono T, Rokuda M, Jang MH, Okada K, et al. (2004) Functional characterization of two type III secretion systems of *Vibrio parahaemolyticus*. *Infect Immun* 72: 6659–6665.
- Meador CE, Parsons MM, Bopp CA, Gerner-Smidt P, Painter JA, et al. (2007) Virulence gene- and pandemic group-specific marker profiling of clinical *Vibrio parahaemolyticus* isolates. *J Clin Microbiol* 45: 1133–1139.
- Skorupski K, Taylor RK (1997) Control of the ToxR virulence regulon in *Vibrio cholerae* by environmental stimuli. *Mol Microbiol* 25: 1003–1009.
- Miller VL, Mekalanos JJ (1988) A novel suicide vector and its use in construction of insertion mutations: osmoregulation of outer membrane proteins and virulence determinants in *Vibrio cholerae* requires toxR. *J Bacteriol* 170: 2575–2583.
- Kodama T, Rokuda M, Park KS, Cantarelli VV, Matsuda S, et al. (2007) Identification and characterization of VopT, a novel ADP-ribosyltransferase effector protein secreted via the *Vibrio parahaemolyticus* type III secretion system 2. *Cell Microbiol* 9: 2598–2609.
- Kodama T, Hiyoshi H, Gotoh K, Akeda Y, Matsuda S, et al. (2008) Identification of two translocon proteins of *Vibrio parahaemolyticus* type III secretion system 2. *Infect Immun* 76: 4282–4289.
- Honda T, Ni YX, Hata A, Yoh M, Miwatani T, et al. (1990) Properties of a hemolysin related to the thermostable direct hemolysin produced by a Kanagawa phenomenon negative, clinical isolate of *Vibrio parahaemolyticus*. *Can J Microbiol* 36: 395–399.
- Niikawa T, Obara Y, Yamai S, Miyamoto Y (1972) Purification of a hemolysin from *Vibrio parahaemolyticus*. *Jpn J Med Sci Biol* 25: 197–200.
- Zen-Yoji H, Hitokoto H, Morozumi S, Le Clair RA (1971) Purification and characterization of a hemolysin produced by *Vibrio parahaemolyticus*. *J Infect Dis* 123: 665–667.
- Sakurai J, Matsuzaki A, Miwatani T (1973) Purification and characterization of thermostable direct hemolysin of *Vibrio parahaemolyticus*. *Infect Immun* 8: 775–780.
- Miyamoto Y, Obara Y, Niikawa T, Yamai S, Kato T, et al. (1980) Simplified purification and biophysicochemical characteristics of Kanagawa phenomenon-associated hemolysin of *Vibrio parahaemolyticus*. *Infect Immun* 28: 567–576.
- Nishibuchi M, Fasano A, Russell RG, Kaper JB (1992) Enterotoxigenicity of *Vibrio parahaemolyticus* with and without genes encoding thermostable direct hemolysin. *Infect Immun* 60: 3539–3545.
- Park KS, Ono T, Rokuda M, Jang MH, Iida T, et al. (2004) Cytotoxicity and enterotoxigenicity of the thermostable direct hemolysin-deletion mutants of *Vibrio parahaemolyticus*. *Microbiol Immunol* 48: 313–318.
- Okada N, Iida T, Park KS, Goto N, Yasunaga T, et al. (2009) Identification and characterization of a novel type III secretion system in trh-positive *Vibrio parahaemolyticus* strain TH3996 reveal genetic lineage and diversity of pathogenic machinery beyond the species level. *Infect Immun* 77: 904–913.
- Tam VC, Serruto D, Dziejman M, Bricher W, Mekalanos JJ (2007) A type III secretion system in *Vibrio cholerae* translocates a formin/spire hybrid-like actin nucleator to promote intestinal colonization. *Cell Host Microbe* 1: 95–107.
- Dziejman M, Serruto D, Tam VC, Sturtevant D, Diraphat P, et al. (2005) Genomic characterization of non-O1, non-O139 *Vibrio cholerae* reveals genes for a type III secretion system. *Proc Natl Acad Sci U S A* 102: 3465–3470.
- Miller VL, Taylor RK, Mekalanos JJ (1987) Cholera toxin transcriptional activator toxR is a transmembrane DNA binding protein. *Cell* 48: 271–279.
- Hung DT, Mekalanos JJ (2005) Bile acids induce cholera toxin expression in *Vibrio cholerae* in a ToxT-independent manner. *Proc Natl Acad Sci U S A* 102: 3028–3033.
- Lin Z, Kumagai K, Baba K, Mekalanos JJ, Nishibuchi M (1993) *Vibrio parahaemolyticus* has a homolog of the *Vibrio cholerae* toxRS operon that

- mediates environmentally induced regulation of the thermostable direct hemolysin gene. *J Bacteriol* 175: 3844–3855.
40. Nakano M, Takahashi A, Su Z, Harada N, Mawatari K, et al. (2008) Hfq regulates the expression of the thermostable direct hemolysin gene in *Vibrio parahaemolyticus*. *BMC Microbiol* 8: 155.
  41. Valentin-Hansen P, Eriksen M, Udesen C (2004) The bacterial Sm-like protein Hfq: a key player in RNA transactions. *Mol Microbiol* 51: 1525–1533.
  42. Miller JH (1972) Experiment 48 Assay of  $\beta$ -Galactosidase. *Experiments in Molecular Genetics*. Cold Spring Harbor, NY.: Cold Spring Harbor Laboratory.
  43. Ono T, Park KS, Ueta M, Iida T, Honda T (2006) Identification of proteins secreted via *Vibrio parahaemolyticus* type III secretion system 1. *Infect Immun* 74: 1032–1042.
  44. Casadaban MJ (1976) Transposition and fusion of the lac genes to selected promoters in *Escherichia coli* using bacteriophage lambda and Mu. *J Mol Biol* 104: 541–555.
  45. Parales RE, Harwood CS (1993) Construction and use of a new broad-host-range lacZ transcriptional fusion vector, pHRP309, for gram- bacteria. *Gene* 133: 23–30.
  46. Kodama T, Akeda Y, Kono G, Takahashi A, Imura K, et al. (2002) The EspB protein of enterohaemorrhagic *Escherichia coli* interacts directly with alpha-catenin. *Cell Microbiol* 4: 213–222.
  47. Nomura T, Hamashima H, Okamoto K (2000) Carboxy terminal region of haemolysin of *Aeromonas sobria* triggers dimerization. *Microb Pathog* 28: 25–36.
